# Supplementary material for: Antioxidant activity of yeast mannans and their growth-promoting effect on Lactobacillus strains
Source: Royal Society of Chemistry journal article supplement (doi:10.1039/d1fo01470f), 2021-01-01
Supplement: d1fo01470f1.pdf [file d1fo01470f1.pdf]

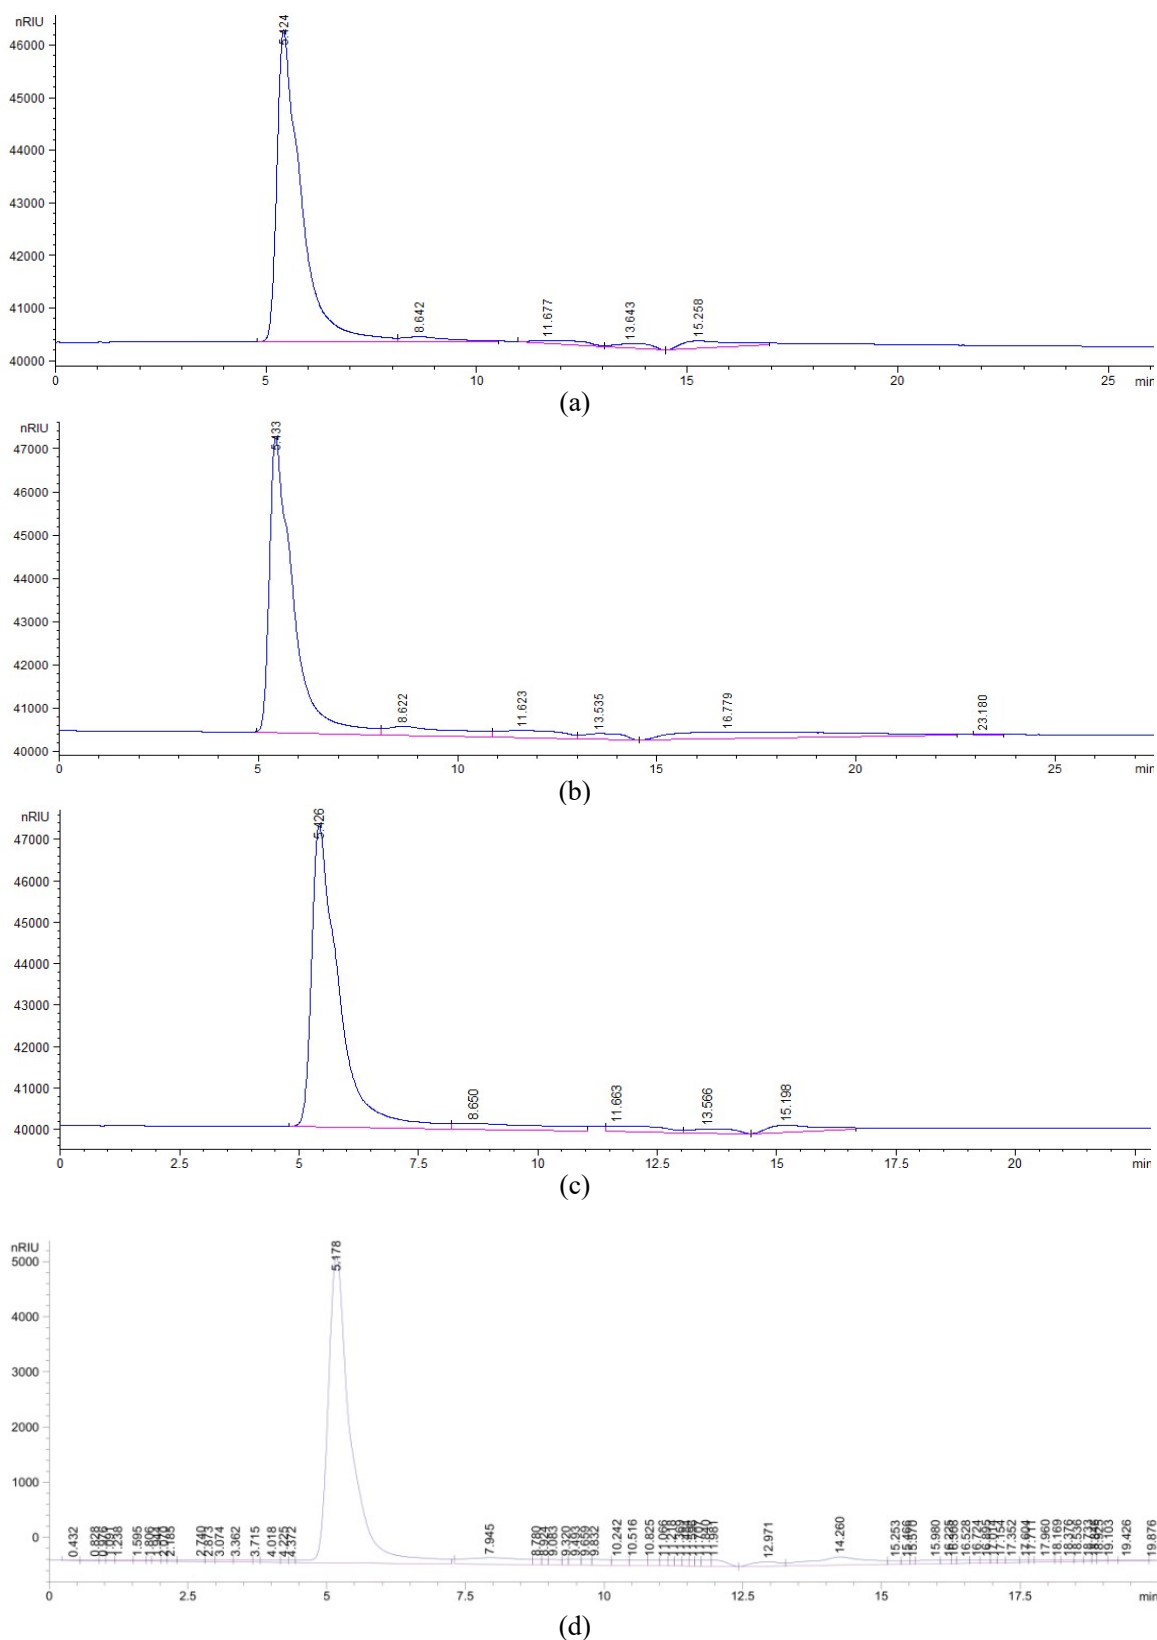

Fig.S1 High performance liquid chromatography spectra obtained in the purity determination of YM-30 (a), YM-60 (b), YM-90 (c) and standard mannose (d).

The high performance liquid chromatography was used to determine the purity of yeast mannans, and part of the typical spectra were shown in Fig.S1. The distinct peaks at 5.4 min from yeast mannans is corresponding to the peak at 5.178 min from standard mannose. And for other small-molecule carbohydrates, the peak times are sucrose at 8.6 min, glucose at 11.6 min and fructose at 13.5 min. According to the integral area method, the mannan contents of YM-30, YM-60 and YM-90 reached 90.62%, 95.21% and 95.38%, respectively.
